# Supplementary material for: Impact of coexisting type 2 diabetes mellitus on the urinary microbiota of kidney stone patients
Source: PeerJ journal article supplement (doi:10.7717/peerj.16920), 2024-02-26

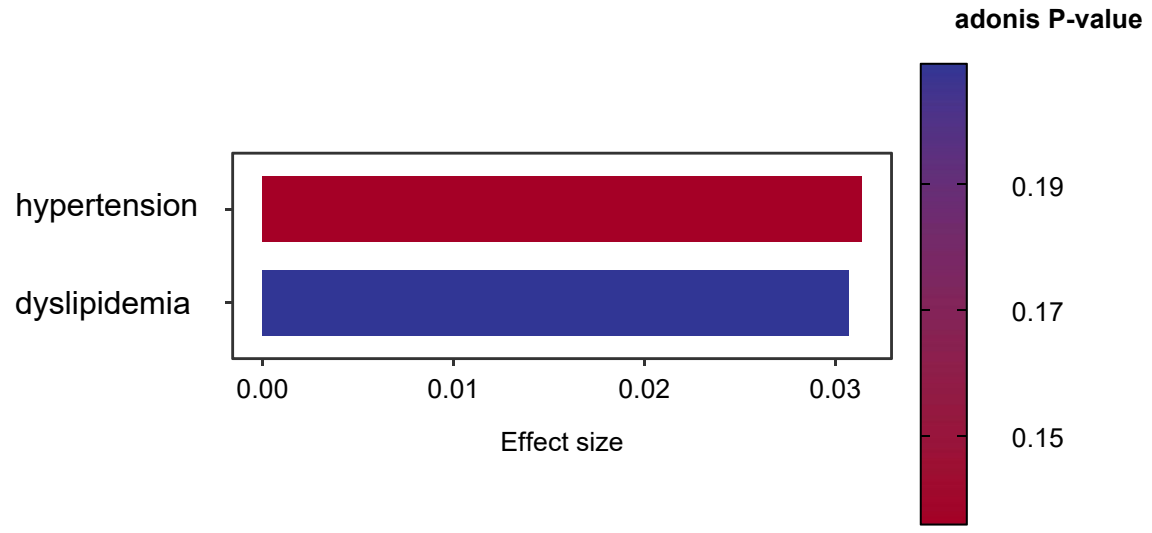

Supplement: Figure_S1.pdf [file Figure_S1.pdf]
